# Supplementary material for: Sustainable electrochemical synthesis of dry formaldehyde from anhydrous methanol
Source: Royal Society of Chemistry journal article supplement (doi:10.1039/d3gc04978g), 2024-01-01
Supplement: d3gc04978g1.pdf [file d3gc04978g1.pdf]

## Supplementary Information

### **Sustainable electrochemical synthesis of dry formaldehyde from anhydrous methanol**

Florian Schwarz, Elizabeth Larenz, Anna K. Mechler\*

Electrochemical Reaction Engineering (AVT.ERT), RWTH Aachen University,  
Forckenbeckstr. 51, Aachen

\* Corresponding author: [anna.mechler@avt.rwth-aachen.de](mailto:anna.mechler@avt.rwth-aachen.de)

|                   |   |
|-------------------|---|
| Table of Contents | 1 |
| Figures           | 2 |
| Tables            | 4 |

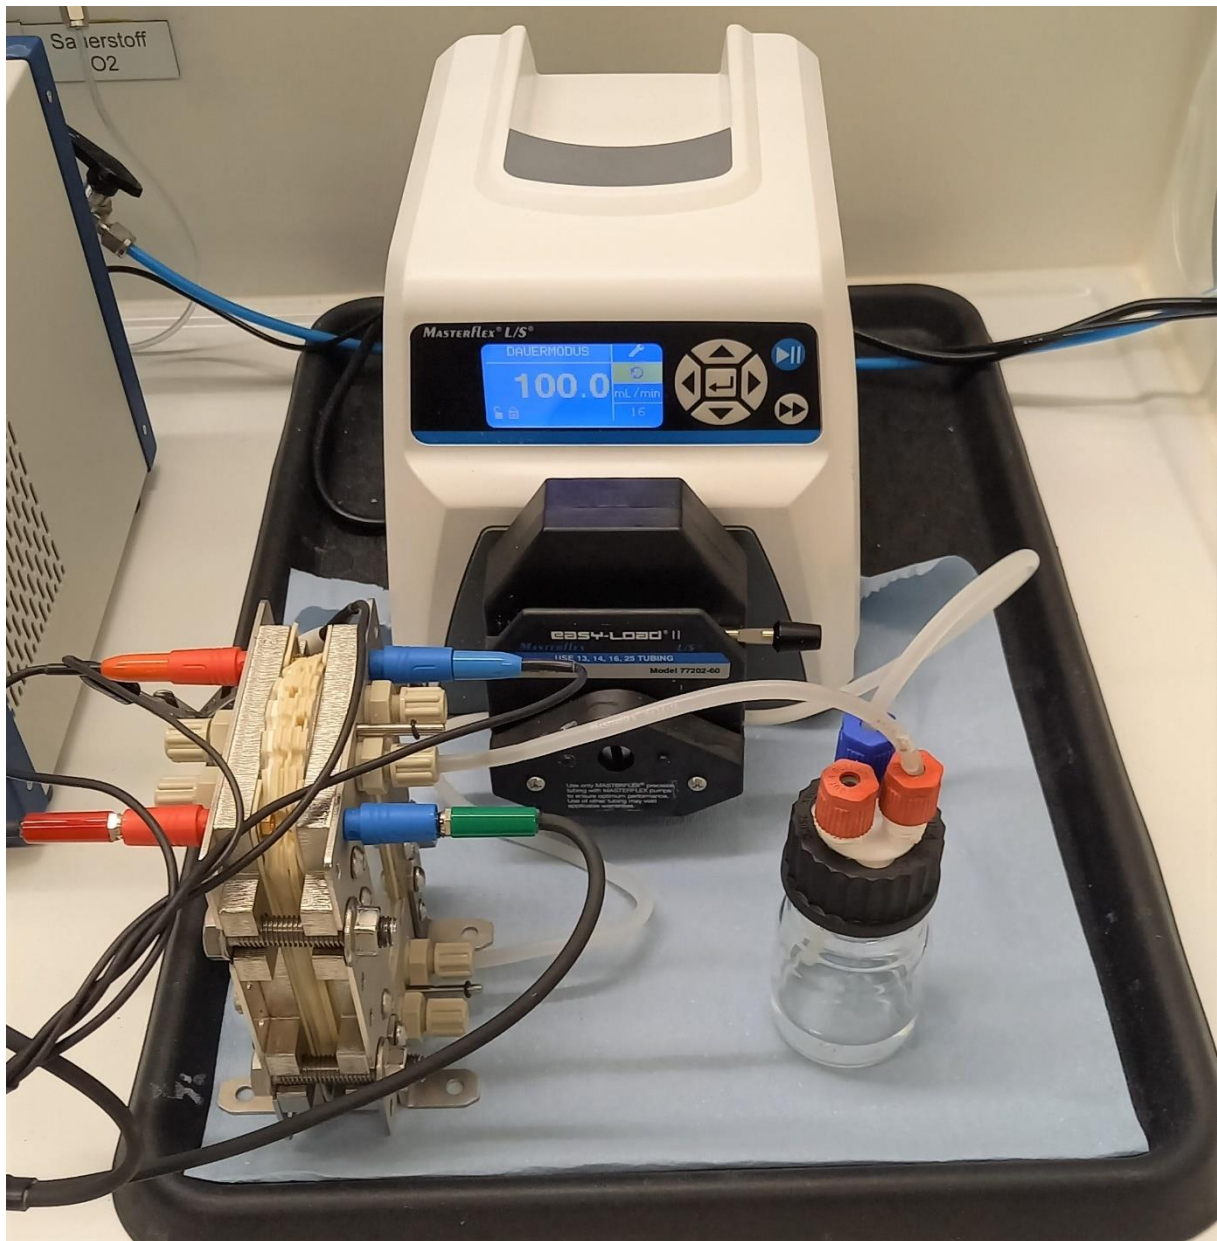

**Figure S1.** Picture of the used cell-setup.

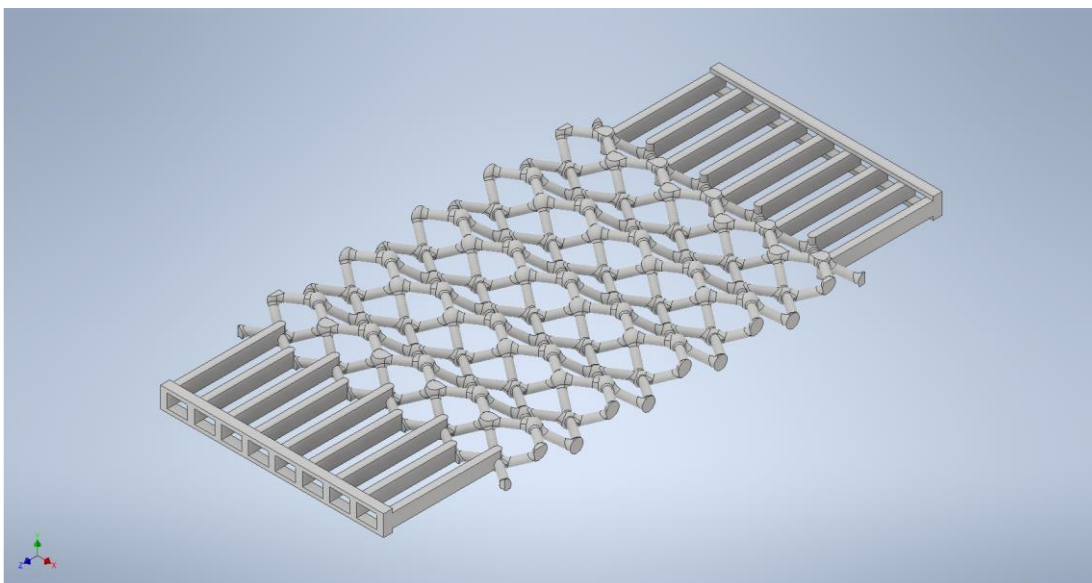

**Figure S2.** 3D printed turbulence promoter.

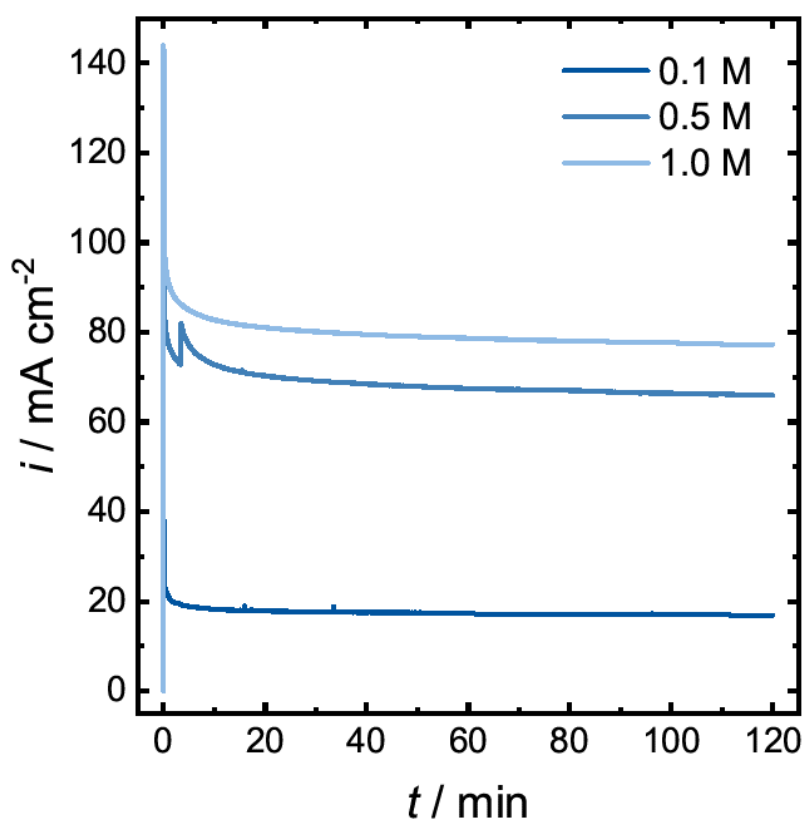

**Figure S3.** CVs in different NaOMe concentrations at 2.4 V vs. Fc for 2 h on a Pt working electrode in a H-cell.

**Table S1.** Formaldehyde and formic acid concentrations determined via HPLC for the H-cell experiments with varied electrolyte concentrations. These are single point measurements with an HPLC error of 1%.

| $c(\text{NaOMe})$<br>$\text{mol L}^{-1}$ | HCHO<br>$c$<br>$\text{mg L}^{-1}$ | HCOOH<br>$c$<br>$\text{mg L}^{-1}$ |
|------------------------------------------|-----------------------------------|------------------------------------|
| 0.1                                      | 71                                | 7                                  |
| 0.5                                      | 199                               | 13                                 |
| 1.0                                      | 176                               | 113                                |

**Table S2.** Formaldehyde and formic acid concentrations determined via HPLC for the flow cell experiments with varied flow rates in 0.1 and 1.0 M NaOMe.

| $c(\text{NaOMe})$<br>$\text{mol L}^{-1}$ | Flow rate<br>$\text{mL min}^{-1}$ | HCHO                                        |                                          | HCOOH                                       |                                          |
|------------------------------------------|-----------------------------------|---------------------------------------------|------------------------------------------|---------------------------------------------|------------------------------------------|
|                                          |                                   | $c_{\text{coverage}}$<br>$\text{mg L}^{-1}$ | $c_{\text{error}}$<br>$\text{mg L}^{-1}$ | $c_{\text{coverage}}$<br>$\text{mg L}^{-1}$ | $c_{\text{error}}$<br>$\text{mg L}^{-1}$ |
| 0.1                                      | 10                                | 263                                         | 10                                       | 24                                          | 9                                        |
|                                          | 50                                | 237                                         | 8                                        | 17                                          | 2                                        |
|                                          | 100                               | 247                                         | 4                                        | 20                                          | 6                                        |
|                                          | 150                               | 254                                         | 4                                        | 15                                          | 1                                        |
| 1.0                                      | 10                                | 263                                         | 21                                       | 37                                          | 6                                        |
|                                          | 50                                | 261                                         | 9                                        | 37                                          | 4                                        |
|                                          | 100                               | 269                                         | 8                                        | 29                                          | 3                                        |
|                                          | 150                               | 259                                         | 37                                       | 33                                          | 1                                        |

**Table S3.** Formaldehyde and formic acid concentrations determined via HPLC for the flow cell experiments with varied current densities in 0.1 and 1.0 M NaOMe.

| $c(\text{NaOMe})$<br>mol L <sup>-1</sup> | Current<br>density<br>mA cm <sup>-2</sup> | HCHO                           |                             | HCOOH                          |                             |
|------------------------------------------|-------------------------------------------|--------------------------------|-----------------------------|--------------------------------|-----------------------------|
|                                          |                                           | Coverage<br>mg L <sup>-1</sup> | Error<br>mg L <sup>-1</sup> | Coverage<br>mg L <sup>-1</sup> | Error<br>mg L <sup>-1</sup> |
| 0.1                                      | 10                                        | 679                            | 22                          | 12                             | 6                           |
|                                          | 20                                        | 1387                           | 65                          | 11                             | 5                           |
|                                          | 30                                        | 2209                           | 88                          | 5                              | 2                           |
|                                          | 40                                        | 3017                           | 88                          | 3                              | 2                           |
|                                          | 50                                        | 3842                           | 116                         | 3                              | 1                           |
|                                          | 60                                        | 4863                           | 399                         | 3                              | 2                           |
|                                          | 70                                        | 5401                           | 129                         | 2                              | 1                           |
|                                          | 80                                        | 6103                           | 249                         | 2                              | 0                           |
|                                          | 90                                        | 6874                           | 188                         | 2                              | 0                           |
|                                          | 100                                       | 7687                           | 202                         | 2                              | 0                           |
| 1.0                                      | 10                                        | 537                            | 9                           | 121                            | 8                           |
|                                          | 20                                        | 1063                           | 35                          | 268                            | 12                          |
|                                          | 30                                        | 1517                           | 44                          | 491                            | 27                          |
|                                          | 40                                        | 1739                           | 79                          | 830                            | 178                         |
|                                          | 50                                        | 2146                           | 98                          | 1115                           | 248                         |
|                                          | 60                                        | 2560                           | 162                         | 1364                           | 291                         |
|                                          | 70                                        | 3009                           | 35                          | 1847                           | 43                          |
|                                          | 80                                        | 3170                           | 23                          | 2193                           | 43                          |
|                                          | 90                                        | 3368                           | 73                          | 2450                           | 176                         |
|                                          | 100                                       | 3789                           | 65                          | 2883                           | 54                          |
